1  
2 Interspecies variation in hypoxia tolerance, swimming  
3 performance and plasticity in cyprinids that prefer different  
4 habitats

5  
6 Shi-Jian Fu <sup>1,2\*</sup>, Cheng Fu <sup>2</sup>, Guan-Jie Yan <sup>1</sup>, Zhen-Dong Cao <sup>1</sup>, An-Jie  
7 Zhang <sup>1</sup> and Xu Pang <sup>1</sup>

8  
9 1 Laboratory of Evolutionary Physiology and Behaviour, Chongqing Key  
10 Laboratory of Animal Biology, Chongqing Normal University, Chongqing,  
11 400047, China

12  
13 2 College of Resources and Environmental Science, Key Laboratory of  
14 Southwest Resource Exploitation and Environmental Disaster Controlling  
15 Project of the Education Ministry, Chongqing University, Chongqing 400030,  
16 China

17  
18  
19  
20 \* Author to whom correspondence should be addressed. E-mail:  
21 [shijianfu9@hotmail.com](mailto:shijianfu9@hotmail.com)

22 Running title: Hypoxia tolerance and swimming in carps  
23

24 **Abstract** This study quantified and compared hypoxia tolerance and swim performance among  
25 cyprinid fish species from rapid-flow, slow-flow and intermediate-flow habitats (4 species per  
26 habitat) in China. In addition, we explored effects of short-term acclimation on swim  
27 performance, maximum metabolic rate ( $\dot{M}_{O_2 \max}$ ) and gill remodelling to detect  
28 habitat-associated patterns of plastic response to hypoxia. Indices of hypoxia tolerance included  
29 oxygen threshold for loss of equilibrium (LOE<sub>50</sub>) and aquatic surface respiration (ASR<sub>50</sub>) and  
30 critical oxygen tension for routine metabolic rate ( $P_{\text{crit}}$ ). Critical swimming speed ( $U_{\text{crit}}$ ) and  
31  $\dot{M}_{O_2 \max}$  were measured under normoxic and hypoxic conditions after 48 hours acclimation to  
32 normoxia and hypoxia, and gill remodelling was estimated after 48 hours of hypoxia exposure.  
33 Both traditional ANCOVA and phylogenetically independent contrast (PDANOVA) analyses  
34 showed that fish species from rapid-flow habitat exhibited lower LOE<sub>50</sub> compared to fish from  
35 intermediate and slow-flow habitats. Habitat-specific difference in  $P_{\text{crit}}$  and  $U_{\text{crit}}$  were detected  
36 using PDANOVA but not traditional ANCOVA analyses, with fish species from rapid-flow  
37 habitat exhibited lower  $P_{\text{crit}}$  but higher  $U_{\text{crit}}$  compared to fish from intermediate and slow-flow  
38 habitats. Fish species from rapid-flow habitats were also characterized by less plasticity in swim  
39 performance and gill morphology in response to hypoxia acclimation compared to species from  
40 slow-flow habitats, but a greater drop in swim performance in response to acute hypoxia  
41 exposure. The study detected a habitat-specific difference in hypoxia tolerance, swimming  
42 performance and its plasticity among fish from habitats with different flow conditions possibly  
43 due to the long-term adaptation to the habitat caused by selection stress. The phylogenetically  
44 independent contrasts were more powerful than traditional statistical analyses according to the  
45 habitat effects in both hypoxia tolerance and swimming performance in this study.

46 **Keyword:** hypoxia tolerance, preferred habitat, swimming performance, phenotypic plasticity,



## 48 Introduction

49 Oxygen availability in aquatic habitats is a major environmental factor that influences the  
50 ecology, behaviour and physiology of fish (Martínez et al., 2011). Hypoxia (defined as any  
51 ‘level of DO low enough to negatively impact the behaviour and (or) physiology of an  
52 organism’) occurs naturally in many aquatic systems (Pollock et al., 2007). However, the  
53 frequency and extent of hypoxia is increasing associated with anthropogenic activities such as  
54 eutrophication and pollution of water bodies (Rabalais et al., 2010). Therefore, it has become  
55 increasingly important to understand the mechanisms that fish use to persist and survive under  
56 hypoxic conditions and to identify indicators of hypoxia tolerance that can be compared across  
57 species and systems. In this study, we use a closely related group of cyprinid fishes from China  
58 to explore habitat-associated hypoxia tolerance, relationships among tolerance indices and  
59 mechanisms that may contribute to the interspecific patterns observed.

60 Critical O<sub>2</sub> tension for routine oxygen consumption rate ( $P_{crit}$ ) is the minimum O<sub>2</sub> level  
61 required to sustain routine oxygen consumption rate ( $\dot{M}_{O_2, rout}$ ), and is considered to be an  
62 indicator of an animal’s hypoxia tolerance (Ultsch et al., 1978; Mandic et al., 2009). In addition  
63 to  $P_{crit}$ , the O<sub>2</sub> threshold for the loss of equilibrium (LOE), which represents the partial pressure  
64 of oxygen at which the fish can maintain balance, is also a frequently used indicator of hypoxia  
65 tolerance (Barnes et al., 2011; Mandic et al., 2013). Aquatic surface respiration (ASR) whereby  
66 fish breathe water from surface film is a common response of water-breathing fish to extreme  
67 hypoxia (Shingles et al., 2005; Sloman et al., 2006). ASR is hypothesised to be triggered by  
68 environmental oxygen tensions at which respiratory mechanisms fail to compensate for  
69 environmental hypoxia (Takasusuki et al., 1998). Therefore, the O<sub>2</sub> threshold for ASR is another  
70 potentially useful hypoxia tolerance indicator in addition to  $P_{crit}$  and LOE.

71 In many fish species, swimming performance is postulated to be a central determinant of  
72 Darwinian fitness (Brett, 1964; Plaut, 2001; Blake, 2004). In fish, the determination of  
73 maximum sustainable swimming speed or critical swimming speed ( $U_{crit}$ ) is widely used to  
74 evaluate aerobic swimming performance (Gregory and Wood, 1998; Plaut, 2001; Lee et al.,  
75 2003; MacNutt et al., 2004). Aerobic swimming performance may be limited by either  $O_2$   
76 uptake and delivery or the aerobic metabolic capacity of the muscle. Ecologically, decreased  
77 swimming performance, which includes both swimming speed and swimming efficiency, in  
78 hypoxic water may render animals more vulnerable to predation and may also affect the  
79 foraging efficiency of predators (Abrahams et al., 2007). Therefore, the mechanism by which  
80 fish can maintain their swimming ability under hypoxic conditions may be closely related to  
81 their survival in such an environment.

82 The ability of fish to maintain their swimming ability under hypoxic condition may be  
83 affected by acclimation to hypoxia, i.e. acclimation may induce a phenotypically plastic  
84 response that improves tolerance to hypoxic stress. For example, the  $\dot{M}_{O_2, max}$  and swimming  
85 performance of goldfish (*Carassius auratus*) improved significantly after acclimation to hypoxia  
86 for 48 h (Fu et al., 2011). And, in several species of cyprinids, including the crucian carp  
87 (*Carassius carassius*) (Sollid et al., 2003), goldfish (Sollid et al., 2005; Mitrovic et al., 2009)  
88 and scaleless carp (*Gymnocypris przewalskii*) (Matey et al., 2008), hypoxia exposure has been  
89 found to result in dramatic changes in gill morphology (Sollid et al., 2003) that reduces the  
90 water-blood diffusion distance (Matey et al., 2008).

91 Hypoxia tolerance and physiological plasticity may differ between fish that live in  
92 rapid-flow habitats and fish that live in slow-water habitats. Rapid-flow rivers often exhibit little  
93 DO change and generally have high DO levels, whereas some small, isolated bodies of water,

94 such as ponds, exhibit large daily DO fluctuations. The Cyprinidae is one of the largest families  
95 of vertebrates in the world. This family has a wide geographic distribution, including mainland  
96 Eurasia, Japan, the East Indian Islands, Africa and North America. There are approximately 532  
97 species of cyprinid within approximately 132 genera in China, and the phylogenetic  
98 relationships among these fish are well-documented (Wang, 2005). Because of considerable  
99 morphological and physiological diversity, cyprinids exist in a wide variety of habitats (Howes,  
100 1991). Therefore, we investigated the hypoxia tolerance, swimming performance and plastic  
101 response to hypoxia in 12 cyprinid species that live in slow-flow, intermediate-flow or  
102 rapid-flow habitats (Table 1). The objective of this study was to test whether hypoxia tolerance,  
103 gill remodelling ability, swimming performance and plasticity are related to habitat. To test our  
104 hypotheses, we used both traditional statistical analyses and phylogenetically independent  
105 contrasts.

## 106 **Materials and methods**

### 107 **Experimental fish and holding conditions**

108 Juveniles of the cyprinid species, *Schizothorax prenanti* (SP), *Ohychostoma sima* (OS),  
109 *Spinibarbus sinensis* (SS), *Carassius auratus* (AA), *Carassius carassius* (CA), *Cyprinus carpio*  
110 (CC), *Aristichthys nobilis* (AN), *Hypophthalmichthys molitrix* (HM), *Parabramis pekinensis*  
111 (PP), *Ctenopharyngodon idellus* (CI), *Ctenopharyngodon piceus* (CP) and *Zacco platypus* (ZP),  
112 were either collected by local fisherman or caught by hook-and-line angling from a local river or  
113 lake, except goldfish that were bought from local market of Chongqing City in southwest China.  
114 Based on our investigation on local fishery catchment and water velocity where fish were  
115 collected, we classified the 12 species into 3 groups: rapid-flow, intermediate-flow, and  
116 slow-flow (Table 1). The fish were maintained in a re-circulating-water rearing system at

117 Chongqing Normal University for at least 2 weeks prior to experimentation. During this time,  
118 the temperature of the de-chlorinated freshwater was maintained at  $15.0 \pm 0.5$  °C and the oxygen  
119 content was maintained above  $10 \text{ mg L}^{-1}$ . The photoperiod was 12L:12D. One tenth of the water  
120 was replaced daily with freshwater to maintain good water quality. Throughout the experimental  
121 period, the fish were fed daily to satiation with commercial forage until 48 h before the  
122 experimental trials. Fish were used only once in any experimental trial. All procedures were  
123 conducted in accordance with the national animal regulations.

#### 124 **Measurement of hypoxia indicators**

##### 125 *ASR<sub>50</sub> and LOE<sub>50</sub>*

126 To quantify hypoxia tolerance, we determined the oxygen tension at which individual fish  
127 *ASR<sub>50</sub>* thresholds and *LOE<sub>50</sub>* thresholds during the same experiment. Briefly, for a given species,  
128 3 groups of 10 individual fish were transferred from the holding tank to a 30 L tank and held  
129 under flow conditions for 4 h prior to the experiment. At the start of the experiment, a mesh  
130 screen was placed below the waterline to prevent the fish from accessing the water-air interface.  
131 Inflowing water was shut off and nitrogen gas was introduced into the tank to rapidly decrease  
132 the DO from normoxic levels of approximately  $10 \text{ mg L}^{-1}$  to  $5 \text{ mg L}^{-1}$ , then  $2.5 \text{ mg L}^{-1}$ , then  $1.2$   
133  $\text{mg L}^{-1}$ . Thereafter, the oxygen tension was decreased in the same step-wise manner but in  
134 smaller steps of  $0.1 \text{ mg L}^{-1}$  to a final DO of  $0 \text{ mg L}^{-1}$ . Fish were held for 1 h intervals at each DO  
135 level and the change of the DO between steps required less than 1 min. At each DO, the total  
136 number of attempts of ASR and LOE were counted over 20 successive 3 min intervals. An  
137 attempt to perform ASR of individual fish was defined as the point where the fish made contact  
138 with the mesh surface suspended below the water-to-air interface and the *ASR<sub>50</sub>* value of any  
139 fish group was defined as the point at which 5 of 10 individual fish made contact with the mesh

140 surface suspended below the water-air interface for 3 consecutive observations. The elapsed  
141 time between ASR of the 1<sup>st</sup> and the 5<sup>th</sup> fish was 40 to 80 min in all species except goldfish and  
142 crucian carp that showed relatively large variation (1 to 4 h). LOE of individual fish was defined  
143 as the failure of the fish to maintain dorsoventral orientation and the LOE<sub>50</sub> value of any fish  
144 group was defined as the DO point at which 5 of 10 individual fish failed to maintain a  
145 dorsoventral orientation for 3 consecutive observations. The elapsed time between LOE of the  
146 1<sup>st</sup> and the 5<sup>th</sup> fish was 20 to 60 min in all experiment fish species except goldfish and crucian  
147 carp that showed no LOE.

#### 148 *Determination of $\dot{M}_{O_2\text{ rou}}$ and $P_{crit}$*

149 After 48 h fasting, 15 fish were randomly selected from each experimental group and placed  
150 in 160 mL respirometers for measurement of  $\dot{M}_{O_2}$  and  $P_{crit}$  (Zhang et al., 2010). The fish were  
151 allowed to recover from transfer to the respirometer for 4 h. During this time, continuously  
152 aerated water flowed ( $3\text{ cm s}^{-1}$ ) through the respirometer. Subsequently, the respirometer was  
153 closed and  $\dot{M}_{O_2}$  was measured over a range of water DO values as the fish depleted the oxygen  
154 within the closed respirometer, beginning at approximately 95% saturation and decreasing to 1%  
155 saturation with a duration of 90 to 120 min. If the fish showed movements such as struggling  
156 and moving back and forth during the experiment, the data from the trial were discarded. To  
157 measure DO, the circulating water from the respirometer was drawn from the respirometer by a  
158 peristaltic pump, forced past a DO probe (HQ20, Hach Company, Loveland, CO, USA) housed  
159 in a sealed thermostated chamber, and then returned to the respirometer. The temperature of the  
160 system was maintained at  $15 \pm 0.2\text{ }^\circ\text{C}$ .

161 The following formula was used to calculate the  $\dot{M}_{O_2}$  ( $\text{mg kg}^{-1}\text{ h}^{-1}$ ) of individual fish:



162  $\dot{M}_{O_2} = ([O_2]_k - [O_2]_{k+1}) VOL / (t \times m)$  (1)

163 where  $[O_2]_k$  is the oxygen concentration ( $\text{mg L}^{-1}$ ) at time point  $k$  and  $[O_2]_{k+1}$  is the oxygen  
164 concentration ( $\text{mg L}^{-1}$ ) at the next time point. These values were calculated according to the  $O_2$   
165 solubility coefficient in water at the corresponding temperature and pressure.  $VOL$  (L) is the  
166 total volume of the respirometer minus the volume of the fish,  $t$  (h) is the interval between time  
167 points  $k$  and  $k+1$  and  $m$  (kg) is the body mass of the fish. To account for effects of body size, the  
168  $\dot{M}_{O_2}$  was adjusted to a standard body mass of 1 kg using a mass exponent of 0.75 (Reidy et al.,  
169 2000).

170 The  $P_{crit}$  is the point at which  $\dot{M}_{O_2, \text{rout}}$  could no longer be maintained with a further reduction  
171 in the water  $O_2$  tension and was estimated for the individual fish with the two-segment linear  
172 model described by Yeager and Ultsch (1989).

### 173 **Acclimation to hypoxia**

174 After the 2-week habituation period, the fish were fasted for 48 h, and 60 fish of similar size  
175 were randomly selected and divided into the hypoxia acclimation group and control acclimation  
176 group. The water temperature was maintained at 15 °C. Thirty fish were transferred to a 120 L  
177 exposure chamber in which hypoxia was achieved by covering the surface of the water with  
178 translucent plastic and bubbling nitrogen into the water (Matey et al., 2008). The DO was  
179 reduced from aerated values of  $10 \text{ mg L}^{-1}$  to  $0.3 \text{ mg L}^{-1}$  over 1 h and was then maintained at  $0.3$   
180  $\text{mg L}^{-1}$  for 48 h. During this time, the water DO was continuously monitored using a DO probe.

### 181 **Measurement of $U_{crit}$**

182 After 48 h acclimation to hypoxic or normoxic (control group) conditions, 20 fish were  
183 selected from each group and subjected to a critical swimming speed ( $U_{crit}$ ) test in either  
184 normoxic water ( $10 \text{ mg L}^{-1}$ ,  $n = 10$ ) or hypoxic water ( $1 \text{ mg L}^{-1}$ ,  $n = 10$ ). The water DO ranged

185 from 10.2 to 10.4 mg L<sup>-1</sup> for normoxic swimming conditions and from 1 to 1.2 mg L<sup>-1</sup> for  
186 hypoxic swimming conditions.

187 A Brett-type swimming tunnel respirometer with a swim chamber with 19.87 cm<sup>2</sup>  
188 cross-sectional area was used to measure the  $U_{crit}$  (total volume 3.5 L, see detail in Li et al., 2010  
189 and Pang et al., 2010) of the fish. The fish were individually transferred into the swim tunnel  
190 and allowed to recover at either normoxic or hypoxic water for 1 h (Fu et al., 2011). The water  
191 temperature in the swim chamber was controlled at  $15 \pm 0.2$  °C. The water velocity was 3 cm s<sup>-1</sup>  
192 during habituation period. The water velocity was increased in 5 cm s<sup>-1</sup> increments every 30 min  
193 until the fish became fatigued. Fatigue was defined as the time at which the fish failed to move  
194 off the rear honeycomb screen of the swim chamber for 20 s (Lee et al., 2003). The  $U_{crit}$  was  
195 calculated for the individual fish using Brett's equation (Brett, 1964) as follows:

$$196 \quad U_{crit} = V + (t / T) \Delta V \quad (2)$$

197 where  $V$  is the fastest speed at which the fish swam for the entire time period (cm s<sup>-1</sup>),  $\Delta V$  is  
198 the velocity increment (5 cm s<sup>-1</sup>),  $T$  is the prescribed period of swimming per speed (30 min) and  
199  $t$  is the length of time that the fish swam at the final speed (min). The swim tunnel was designed  
200 to switch between a closed mode and an open mode. The closed mode was for respirometry, and  
201 the open mode was to replenish the oxygen levels. In the open mode, the respirometer was  
202 supplied with 15 °C water supplied from a 350 L reservoir tank at a flow rate of 500 mL min<sup>-1</sup>.  
203 For the normoxic conditions, the water in the reservoir tank was fully aerated (10 mg L<sup>-1</sup>),  
204 whereas for the hypoxic conditions, the surface of the reservoir tank was covered with  
205 translucent plastic and the water bubbled with nitrogen to achieve a nominal water DO of 1 mg  
206 L<sup>-1</sup>.

207 In the closed mode, the tunnel was isolated from the reservoir tank and water was recirculated

208 within the system. A small volume of water was drawn from the sealed respirometer by a  
209 peristaltic pump, forced past a DO probe housed in a sealed temperature-controlled chamber,  
210 and then returned to the respirometer. The oxygen concentration ( $\text{mg L}^{-1}$ ) was recorded once  
211 every 2 min. The  $\dot{M}_{\text{O}_2}$  ( $\text{mg kg}^{-1} \text{ h}^{-1}$ ) of the individual fish while swimming was calculated from  
212 the depletion of oxygen according to the following equation:

$$213 \quad \dot{M}_{\text{O}_2} = 60 \text{ slope VOL} / m \quad (3)$$

214 where slope ( $\text{mg L}^{-1} \text{ min}^{-1}$ ) is the decrease in the water DO per min, VOL is the total volume of  
215 the respirometer (3.5 L) minus the volume of the fish and  $m$  is the body mass (kg) of the fish.  
216 The slope was obtained through linear regression between time (min) and water DO ( $\text{mg L}^{-1}$ ).  
217 Only slopes with an  $r^2 > 0.95$  were considered for the analyses. During  $\dot{M}_{\text{O}_2}$  measurements DO  
218 was never allowed to drop by more than  $0.25 \text{ mg L}^{-1}$  in either the normoxic or hypoxic  $U_{\text{crit}}$   
219 determinations. The maximal  $\dot{M}_{\text{O}_2}$  during the  $U_{\text{crit}}$  test was defined as the maximum  
220  $\dot{M}_{\text{O}_2}$  ( $\dot{M}_{\text{O}_2 \text{ max}}$ ). The metabolic rate was adjusted to a standard body mass of 1 kg using a mass  
221 exponent of 0.75 (Reidy et al., 2000).

## 222 **Gill morphology**

223 The gill morphology of only 4 fish species was evaluated, *S. prenanti*, *O. sima*, *S. sinensis*  
224 and *Z. platypus*, because the gill morphology change that was elicited by hypoxia acclimation of  
225 the other 8 species has previously been performed by our laboratory (Dhillon et al., 2013, Table  
226 1).

227 After 48 h acclimation to hypoxic or control conditions, 4 fish from each group were  
228 immediately euthanised using neutralised tricaine methanesulphonate (MS-222,  $50 \text{ mg L}^{-1}$ ) and  
229 terminally sampled. The second gill arch from the right side of each fish was removed, rinsed,  
230 and immediately fixed in cold Karnovsky's fixative for scanning electron microscopy (SEM) (at

231 the Third Military Medical University, Chongqing, China).

232 The middle part of each fixed gill arch (5 mm) with up to 20 filaments in both the anterior and  
233 posterior rows was used for scanning electron microscopy. All fixed gill tissues were rinsed in  
234 phosphate-buffered saline (PBS) and post-fixed in 1% osmium tetroxide for 1 h. The gill tissues  
235 were dehydrated in ascending concentrations of ethanol from 30% to 100%, critical-point dried  
236 with liquid CO<sub>2</sub>, mounted on stubs, sputter-coated with gold–palladium, and examined with a  
237 Hitachi S 3400 scanning electron microscope (SEM) at an accelerating voltage of 15 kV. The  
238 protruding lamella height was measured to estimate changes in the gill morphology.

### 239 **Data analysis**

240 Statistics17 was used for data analysis. *P* values < 0.05 were considered statistically  
241 significant, and all data are presented as the mean ± SEM.

242 The effects of the habitats and species (nested within habitat) on hypoxia tolerance and  
243 swimming performance (we only tested the swimming performance of control group measured  
244 under normoxic condition) were determined by a nested analysis of covariance (ANCOVA,  
245 body size used as the covariate). One-way ANCOVA which followed by a Duncan  
246 multiple-comparison posthoc test was used to detect differences among habitats. The effect of  
247 species and DO (oxygen concentration in which the trait was measured), and their interaction on  
248  $U_{\text{crit}}$  and  $\dot{M}_{\text{O}_2 \text{ max}}$  was performed by two-way ANCOVA. The effect of hypoxia acclimation on  
249  $U_{\text{crit}}$  and  $\dot{M}_{\text{O}_2 \text{ max}}$  was detected using t-tests. For the 12 fish species, Pearson correlation was  
250 used to examine the relationship between ASR<sub>50</sub> and LOE<sub>50</sub>, and  $P_{\text{crit}}$  and  $\dot{M}_{\text{O}_2 \text{ rest}}$ .

251 We also conducted phylogenetically independent ANOVAs, which tested for differences in  
252 hypoxia tolerance and swimming performance (for the control group measured under normoxia)  
253 among species inhabiting environments under different flow conditions. We used the PDSIMUL

254 and PDANOVA programs (Garland et al., 1993) to perform phylogenetically independent  
255 ANOVAs. Using these programs, we simulated trait evolution as Brownian motion with the  
256 means and variances of the simulations set to the means and variances of the original data. We  
257 performed 1000 simulations, producing a null distribution of F-statistics against which the  
258 F-value of one way ANOVA from the actual data could be compared to assess the statistical  
259 significance (i.e., we determined how different the observed patterns were from those expected  
260 via genetic drift alone). We constructed a best-estimate phylogenetic hypothesis for this group  
261 of species based on previous morphological and molecular studies (Fig. 1). All branch lengths  
262 were set as equal to one.

## 263 **Results**

### 264 **Hypoxia tolerance differences based on habitat**

#### 265 *ASR<sub>50</sub>*

266 Effects of species on  $ASR_{50}$  were significant while neither habitat nor covariate (fish length)  
267 was significant (nested ANCOVA, Fig. 2A). The habitat effect on  $ASR_{50}$  was also not significant  
268 when controlling for phylogeny (PDANOVA,  $P = 0.429$ ).

#### 269 *LOE<sub>50</sub>*

270 Both habitat and species showed significant effects, while body length showed no effect on  
271  $LOE_{50}$  (nested ANCOVA, Fig. 2A). The habitat's effect on  $LOE_{50}$  was also significant when  
272 controlling for phylogeny (PDANOVA,  $P = 0.004$ ). The  $LOE_{50}$  of fish species from rapid-flow  
273 water exhibited significantly higher  $LOE_{50}$  values than the intermediate group while the latter  
274 exhibited significantly higher  $LOE_{50}$  values than the fish species from slow-flow habitats  
275 (one-way ANCOVA,  $P < 0.001$ , Fig. 2B). Neither AA nor CA showed any sign of  $LOE_{50}$  after  
276 exposure to DO-free water for 1 h.

277 The  $ASR_{50}$  value was positively related to  $LOE_{50}$  among 12 species ( $R^2 = 0.580$ ,  $P = 0.004$ ,  
 278 Fig. 2C).

### 279 ***P*<sub>crit</sub> and $\dot{M}_{O_2 \text{ rest}}$**

280 The  $P_{crit}$  varied from  $0.78 \pm 0.05$  in AN to  $3.00 \pm 0.38$  mg O<sub>2</sub> L<sup>-1</sup> in ZP (Fig. 3A), whereas  
 281 the  $\dot{M}_{O_2 \text{ rest}}$  varied from  $29.5 \pm 2.1$  in PP to  $63.6 \pm 4.7$  mg O<sub>2</sub> kg<sup>-1</sup> h<sup>-1</sup> in SP (Fig. 3B). There was  
 282 no significant difference in neither  $P_{crit}$  nor  $\dot{M}_{O_2 \text{ rest}}$  among habitats (nested ANCOVA,  $P > 0.05$ ).  
 283 However, the habitat effect was significant for  $P_{crit}$  when controlling for phylogeny (Fig. 3A, B).  
 284 One-way ANCOVA indicated a significant difference in  $P_{crit}$  between the rapid-flow group and  
 285 the other 2 groups. The mean  $P_{crit}$  value was positively related to mean  $\dot{M}_{O_2 \text{ rest}}$  among 12  
 286 species ( $R^2 = 0.341$ ,  $P = 0.038$ , Fig. 3C).

### 287 ***U*<sub>crit</sub> differences based on habitat**

#### 288 ***U*<sub>crit</sub>**

289 In the control group (normoxia), the fish species showed great variation in  $U_{crit}$  ranging from  
 290 7.05 BL s<sup>-1</sup> in OS to 3.62 BL s<sup>-1</sup> in CI (Fig. 3A). Both species and body length showed  
 291 significant effects ( $P < 0.001$ ) while habitat showed no significant effect on  $U_{crit}$  (nested  
 292 ANCOVA, Fig. 2A). However, the habitat's effect on  $U_{crit}$  was showed using phylogenetic  
 293 analysis (PDANOVA,  $P = 0.046$ ). The  $U_{crit}$  of the rapid-flow fish species was significantly  
 294 higher than the other fish groups (one-way ANCOVA,  $P < 0.001$ ).

### 295 ***Sensitivity to hypoxia***

296 Under hypoxic conditions, all fish species showed significantly lower  $U_{crit}$  values ( $P < 0.001$ ).  
 297 The  $U_{crit}$  value of control fish decreased by 21 to 60%, with the percentage reduction being  
 298 greater in fish from rapid-flow environments (significant species by condition interaction,  $P <$   
 299 0.001, Fig. 4A, B).

### 300 *Acclimation effect*

301 After 48 h hypoxia acclimation, only CA and AA showed significantly higher  $U_{crit}$  values  
302 under normoxic conditions, whereas both SP and PP showed significantly lower  $U_{crit}$  values  
303 compared to the control group (Fig. 4A, B,  $P < 0.05$ ). However, when measured under hypoxic  
304 conditions, half the fish species from the intermediate group, all 4 fish species from the  
305 slow-flow group showed significantly higher  $U_{crit}$  values compared to the control fish under  
306 hypoxic conditions. Therefore, the hypoxia acclimation had no effect on the  $U_{crit}$  measured  
307 under hypoxia for the rapid-flow species, but significantly improved the  $U_{crit}$  measured under  
308 hypoxia for the slow-flow species.

### 309 $\dot{M}_{O_2 \max}$ differences based on habitat

#### 310 $\dot{M}_{O_2 \max}$

311 The  $\dot{M}_{O_2 \max}$  also showed great variation among the different species. SP showed the  
312 highest  $\dot{M}_{O_2 \max}$  value with  $267 \text{ mg O}_2 \text{ kg}^{-1} \text{ h}^{-1}$ , whereas CA showed the lowest value with  $117$   
313  $\text{mg O}_2 \text{ kg}^{-1} \text{ h}^{-1}$  (Fig. 3C). However, neither habitat nor body mass showed significant effects on  
314  $\dot{M}_{O_2 \max}$  (nested ANCOVA, Fig. 5A). The habitat effect on  $\dot{M}_{O_2 \max}$  was also not significant  
315 when controlling for phylogeny (PDANOVA,  $P = 0.142$ ).

### 316 *Sensitivity to hypoxia*

317 Under hypoxic conditions, all fish species showed significantly lower  $\dot{M}_{O_2 \max}$  values ( $P <$   
318  $0.001$ ). The  $\dot{M}_{O_2 \max}$  value of control fish decreased by 53 to 81%, with the percentage  
319 reduction being greater in fish from rapid-flow environments (significant species by condition  
320 interaction,  $P < 0.001$ , Fig. 5A, B).

### 321 *Acclimation effect*

322 After 48 h hypoxia acclimation, only CA showed significantly higher  $\dot{M}_{O_2 \max}$  values under  
323 normoxic conditions, whereas AN showed significantly lower  $\dot{M}_{O_2 \max}$  values compared to the  
324 control group (Fig. 5A, B) ( $P < 0.05$ ). However, under hypoxic conditions, half the fish species  
325 from the intermediate group and 3 of 4 fish species from the slow-flow group showed  
326 significantly higher  $\dot{M}_{O_2 \max}$  values compared to the control fish ( $P < 0.05$ ). Hypoxia  
327 acclimation had no effect on the  $\dot{M}_{O_2 \max}$  for all 4 rapid-flow fish species.

### 328 **Gill morphology**

329 All 4 fish species that were evaluated exhibited no gill morphology changes after hypoxia  
330 acclimation as indicated by the protruding lamella height. The protruding lamella heights were  
331  $62.1 \pm 4.2$  (N= 4 for all 4 species both before and after hypoxia acclimation) vs.  $54.5 \pm 2.9$ ,  $47.0$   
332  $\pm 3.1$  vs.  $37.6 \pm 3.3$ ,  $51.8 \pm 2.0$  vs.  $53.8 \pm 1.3$  and  $75.2 \pm 2.1$  vs.  $62.0 \pm 3.8$   $\mu\text{m}$  in the  
333 hypoxia-acclimated and non-acclimated SP, OS, SS and ZP, respectively.

### 334 **Discussion**

335 The primary objective of this study was to answer the question of whether hypoxia tolerance  
336 and swimming performance differed in fish species that live in different habitats.  
337 Habitat-specific differences in hypoxia tolerance and swimming performance were detected by  
338 phylogenetically independent contrast while only hypoxia tolerance (as suggested by LOE<sub>50</sub>)  
339 was detected by traditional contrast in this study, suggesting phylogenetically independent  
340 contrast proves to be a more powerful test of habitat than the traditional analyses. The fish  
341 species from rapid-flow habitats showed lower hypoxia tolerance but better swimming  
342 performance and greater sensitivity to DO change compared to slow-flow fish, as expected.  
343 Furthermore, the fish from the slow-flow habitats showed improved swimming and respiratory  
344 capacities when measured under hypoxic conditions after hypoxia acclimation, possibly related



345 to changes in the gill morphology, whereas none of rapid-flow fish showed any improvement in  
346 aerobic swimming performance after hypoxia acclimation.

### 347 **Hypoxia tolerance and preferred habitat**

348 Habitat-specific differences in hypoxia tolerance as suggested by  $LOE_{50}$  and  $P_{crit}$  were  
349 detected by phylogenetically independent contrast in this study. However, the habita-specific  
350 difference in  $P_{crit}$  was not showed by traditional analyses. The difference between these two  
351 methods is the latter take phylogenetic relationship into account. It suggested the  
352 phylogenetically independent contrast may be more powerful than traditional nested ANOVA. It  
353 has been demonstrated that  $P_{crit}$  is quite changeable and is affected by the routine metabolic rate  
354 and, therefore, nutritional status (Hochachka, 1986; Guppy and Withers, 1999), hypoxia  
355 acclimation (Fu et al., 2011) and temperature (Barnes et al., 2011). A positive relationship  
356 between  $P_{crit}$  and  $\dot{M}_{O_2, rest}$  also showed in the present study (Fig. 3C). Another important reason  
357 that  $P_{crit}$  may not be an appropriate indicator for hypoxia tolerance is that it neglects the role of  
358 anaerobic metabolic capacity in hypoxia tolerance (this is particularly true for both AA and CA  
359 in the present study).

360 An animal's ability to tolerate environmental fluctuations requires the integration and  
361 coordination of behavioural, physiological and biochemical processes (Sloman et al., 2008).  
362 Behavioural response of hypoxia using ASR may be beneficial for surviving hypoxia; however,  
363 the threshold for initiating ASR may be affected by perceived predation risk (Sloman et al.,  
364 2008). Although it may be predicted that ASR is triggered by environmental DO levels at which  
365 the respiratory mechanisms fail to compensate for environmental hypoxia (Takasusuki et al.,  
366 1998), other studies have also supported the hypothesis that there is an element of flexibility in  
367 the performance of ASR (Sloman et al., 2008). In this study, there were no significant

368 differences in the ASR among fish with different preferred habitats. Furthermore, both AA and  
369 CA, the champions of anoxia-tolerance, showed a relatively higher ASR threshold, suggesting  
370 that ASR may not be an appropriate hypoxia tolerance indicator for these 2 fish species (Fig. 2).  
371 This may be because some bold fish species, such as AA and CA in this study, performed ASR  
372 early whereas other fish did not. We can also speculate that ASR may change as a result of  
373 predator stress variation.

374 Nevertheless, this study suggested that the LOE might be a better indicator of hypoxia  
375 tolerance, whereas  $P_{crit}$  and ASR may not be appropriate for some species because of  
376 physiological and behavioural factors.

### 377 **Swimming performance, gill morphology, plasticity and preferred habitat**

378 Cyprinids living in rapid-flow water showed higher  $U_{crit}$  values compared to slow-flow fish  
379 species which is independent of phylogenetic relationship, which is consistent with our  
380 hypothesis. Similar to  $P_{crit}$ , traditional contrast showed no significant difference among fish  
381 species from different habitats, which again suggesting that phylogenetically independent  
382 contrast was more powerful to detect the habitat difference than traditional analyses.  
383 Furthermore, the swimming performance of the rapid-flow fish was more sensitive to the DO  
384 change. This may reflect more stable and high DO conditions in rapid-flow habitats. By contrast,  
385 it may be critical for slow-flow fish species to maintain the majority of swimming performance  
386 under hypoxic conditions to survive in such an environment.

387 We determined whether swimming performance showed adaptive plasticity after hypoxia  
388 acclimation and whether such plasticity differed among groups of fish species from different  
389 preferred habitats. All 4 fish species showed no improvement in  $U_{crit}$  after hypoxia acclimation  
390 either under normoxic or hypoxic conditions. However, in the slow-flow fish species, all 4 fish

391 species showed improved swimming performance under hypoxic conditions, whereas AA and  
392 CA also showed improved swimming performance under normoxic conditions. Similar to  
393 swimming performance, the fish species from slow-flow habitats also showed significant gill  
394 morphology changes whereas fish species from rapid-flow habitats showed less or no gill  
395 plasticity after 48 h hypoxia acclimation. It suggested that the improved swimming and  
396 respiratory capacities after hypoxia acclimation might partially due to the gill morphological  
397 change. Interestingly, we provide evidence here that gill remodelling may not be  
398 phylogenetically dependent because closely related fish, such as and PP and CI, showed  
399 alternative morphological responses after hypoxia acclimation. We further suggest that  
400 swimming performance and gill flexibility are habitat-specific as long-term adaption to the  
401 habitat DO condition. Besides morphological change, the physiological mechanism might also  
402 contribute to the improved swimming performance of hypoxia-acclimated fish. It has been  
403 found that hypoxia acclimation results in an increase in [hemoglobin] (Hb) and blood oxygen  
404 carrying capacity (Wells et al., 1989; Silkin and Silkina, 2005), an increase in the number of  
405 muscle mitochondria and muscle myoglobin concentration, and a higher capillarization of  
406 muscle, which improves the extraction and utilization of circulating oxygen stores at low DO  
407 (Sänger, 1993).

408 The acclimation effect on  $U_{crit}$  was more profound when fish that were tested under low DO.  
409 Increased  $O_2$  uptake capacity, which may have been elicited by hypoxia acclimation, may not  
410 result in increased swimming performance under normoxic conditions because the limiting  
411 factor is not likely to be the availability of  $O_2$ . However, when measured under hypoxia,  
412 slow-flow fish showed significant swimming plasticity whereas rapid-flow fish did not.

413 In conclusion, this study clearly demonstrated that there was a phylogenetically-independent

414 habitat-specific difference in both hypoxia tolerance and swimming performance among fish  
415 from habitats with different flow conditions. This difference may reflect response to flow  
416 regime and associated DO differences among habitats. Rapid-flow fish showed poor hypoxia  
417 tolerance but stronger swimming performance than the slow-flow fish, as expected. The  
418 slow-flow fish also displayed significant gill morphology changes and swimming performance  
419 improvement after hypoxia acclimation, whereas rapid-flow fish showed no such ability.  
420 Furthermore, the swimming performance of the slow-flow fish was less sensitive to DO change  
421 compared to the rapid-flow fish. The differences in sensitivity and plasticity of swimming  
422 performance in the fish from habitats with different flow conditions may be due to differences in  
423 O<sub>2</sub> fluctuation among the different habitats. The study also suggested that the phylogenetically  
424 independent contrast might be more powerful than traditional statistical approach when detected  
425 the habitat difference in both swimming performance and hypoxia tolerance.

#### 426 **Acknowledgements**

427 This study was funded by the National Science Foundation of China (NSFC 31172096), the Key  
428 Project of Natural Science Foundation of CQ (cstc2013jjB20003) and the Research Project of  
429 Chongqing Education Committee (KJ130624) granted to S.J.F.

#### 430 **References**

- 431 **Abrahams, M. V., Mangel, M. and Hedges, K.** (2007). Predator–prey interactions and  
432 changing environments: who benefits? *Phil. Trans. R. Soc.* **362B**, 2095-2104.
- 433 **Altimiras, J., Claireaux, G., Sandblom, E., Farrell, A. P., McKenzie, D. J. and Axelsson, M.**  
434 (2008). Gastrointestinal blood flow and postprandial metabolism in swimming sea bass  
435 *Dicentrarchus labrax*. *Physiol. Biochem. Zool.* **81**, 663-672.
- 436 **Barnes, K. R., King, H. and Carter, C. G.** (2011). Hypoxia tolerance and oxygen regulation in

- 437 Atlantic salmon, *Salmo salar* from a Tasmanian population. *Aquaculture*. **318**, 397-401.
- 438 **Bickler, P. E. and Buck, L. T.** (2007). Hypoxia tolerance in reptiles, amphibians, and fishes:  
439 life with variable oxygen availability. *Annu. Rev. Physiol.* **69**, 145-170.
- 440 **Blake, R. W.** (2004). Fish functional design and swimming performance. *J. Fish Biol.* **65**,  
441 1193-1222.
- 442 **Brett, J. R. (1964).** The respiratory metabolism and swimming performance of young sockeye  
443 salmon. *J. Fish. Res. Bd. Can.* **21**, 1183-1226.
- 444 **Burton, T., Killen, S. S., Armstrong, J. D. and Metcalfe, N. B.** (2011). What causes  
445 intraspecific variation in resting metabolic rate and what are its ecological consequences?  
446 *Proc. R. Soc.* **278B**, 3465-3473.
- 447 **Chapman, L. J., Chapman, C. A., Nordlie, F. G. and Rosenberger, A. E.** (2002).  
448 Physiological refugia: swamps, hypoxia tolerance and maintenance of fish diversity in the  
449 Lake Victoria region. *Comp. Biochem. Physiol.* **133A**, 421-437.
- 450 **Diaz, R. J. and Breitburg, D. L.** (2009). The hypoxic environment. In *Hypoxia in Fishes*  
451 (Richards, J. G., Farrel, A. P. & Brauner, C. J., eds), pp. 1–23. San Diego, CA: Elsevier.
- 452 **Dhillon, R. S., Yao, L., Matey, V., Chen, B. J., Zhang, A. J., Cao, Z. D., Fu, S. J., Brauner,**  
453 **C. J., Wang, Y. S. and Richards, J. F.** (2013). Interspecific differences in  
454 hypoxia-induced gill remodeling in carp. *Physiol. Biochem. Zool.* In press.
- 455 **Fu, S. J., Brauner, C. J., Cao, Z. D., Richards, J. G., Peng, J. L., Dhillon, R. and Wang, Y. X.**  
456 (2011). The effect of acclimation to hypoxia and sustained exercise on subsequent hypoxia  
457 tolerance and swimming performance in goldfish (*Carassius auratus*). *J. Exp. Biol.* **214**,  
458 2080-2088.
- 459 **Fu, S. J., Peng, Z., Cao, Z. D., Peng, J. L., He, X. K., Xu, D. and Zhang A. J.** (2012).

- 460 Habitat-specific locomotor variation among Chinese hook snout carp (*Opsariichthys*  
461 *bidens*) along a river. PLoS ONE **7(7)**, e40791.
- 462 **Fu, S. J., Zeng, L. Q., Li, X. M., Pang, X., Cao, Z. D., Peng, J. L. and Wang, Y. X.** (2009).  
463 The behavioral, digestive and metabolic characteristics of fishes with different foraging  
464 strategies. J. Exp. Biol. **212**, 2296-2302.
- 465 **Garland, T., Dickerman, A. W., Janis, C. M. and Jones, J. A.** (1993). Phylogenetic analysis  
466 of covariance by computer simulation. Syst. Biol. **42**, 265-292.
- 467 **Gregory, T. R. and Wood, C. M.** (1998). Individual variation and interrelationships between  
468 swimming performance, growth rate, and feeding in juvenile rainbow trout (*Oncorhynchus*  
469 *mykiss*). Can. J. Fish. Aquat. Sci. **55**, 1583-1590.
- 470 **Guppy, M. and Withers, P.** (1999). Metabolic depression in animals: physiological  
471 perspectives and biochemical generalizations. Biol. Rev. **74**, 1-40.
- 472 **Hochachka, P. W.** (1986). Defense strategies against hypoxia and hypothermia. Science. **231**,  
473 234-241.
- 474 **Howes, G. J.** (1991). Systematics and biogeography: an overview. In: *Cyprinid fishes:*  
475 *systematics, biology and exploitation* (Winfield, I.J., Nelson, J.S., eds.), pp. 1-33. London:  
476 Chapman and Hall.
- 477 **Iversen, N. K., McKenzie, D. J., Malte, H. and Wang, T.** (2010). Reflex bradycardia does not  
478 influence oxygen consumption during hypoxia in the European eel (*Anguilla anguilla*). J.  
479 Comp. Physiol. **180B**, 495-502.
- 480 **Johnston, I. A. and Bernard, L. M.** (1983). Utilization of the ethanol pathway in carp  
481 following exposure to anoxia. J. Exp. Biol. **104**, 73-78.
- 482 **Jourdan-Pineau, H., Dupont-Prinet, A., Claireaux, G. and McKenzie, D. J.** (2010). An

- 483 investigation of metabolic prioritization in the European sea bass, *Dicentrarchus labrax*.  
484 *Physiol. Biochem. Zool.* **83**, 68-77.
- 485 **Lee, G. C., Farrell, A. P., Lotto, A., MacNctt, M. J., Hinch, S. G. and Healey, M. C.** (2003).  
486 The effect of temperature on swimming performance and oxygen consumption in adult  
487 sockeye (*Oncorhynchus nerka*) and coho (*O. kisutch*) salmon stocks. *J. Exp. Biol.* **206**,  
488 3239-3251.
- 489 **Li, X. M., Cao, Z. D., Fu, S. J. and Peng, J. L.** (2010). The effect of exercise training on the  
490 metabolic interaction between digestion and locomotion in juvenile darkbarbel catfish  
491 (*Peltebngrus vachelli*). *Comp. Biochem. Physiol.* **156A**, 67-73.
- 492 **MacNutt, M. J., Hinch, S. G., Farrell, A. P. and Topp, S.** (2004). The effect of temperature  
493 and acclimation period on repeat swimming performance in cutthroat trout. *J. Fish. Biol.*  
494 **65**, 342-353.
- 495 **Mandic, M., Todgham, A. E. and Richards, J. G.** (2009). Mechanisms and evolution of  
496 hypoxia tolerance in fish. *Proc. R. Soc.* **276B**, 735–744.
- 497 **Mandic, M., Speers-Roesch, B. and Richards, J. G.** (2013). Hypoxia tolerance in sculpins is  
498 associated with high anaerobic enzyme activity in brain but not in liver or muscle. *Physiol.*  
499 *Biochem. Zool.* **86**, 92-105.
- 500 **Martínez, M. L., Raynard, E. L., Rees, B. B. and Chapman, L. J.** (2011). Oxygen limitation  
501 and tissue metabolic potential of the African fish *Barbus neumayeri*: roles of native habitat  
502 and acclimatization. *BMC Ecol.* **11**, 2.
- 503 **Matey, V., Richards, J. G., Wang, Y., Wood, C. M., Rogers, J., Davies, R., Murray, B. W.,**  
504 **Chen, X. Q., Du, J. and Brauner, C. J.** (2008). The effect of hypoxia on gill morphology  
505 and ionoregulatory status in the Lake Qinghai scaleless carp, *Gymnocypris przewalskii*. *J.*

- 506 Exp. Biol. **211**, 1063-1074.
- 507 **Mitrovic, D., Dymowska, A., Nilsson, G. E. and Perry, S. F.** (2009). Physiological  
508 consequences of gill remodeling in goldfish (*Carassius auratus*) during exposure to  
509 long-term hypoxia. Am. J. Physiol. **297R**, 224-234.
- 510 **Nilsson, G. E., Dymowska, A., Stecyk, J. A.** (2012). New insights into the plasticity of gill  
511 structure. Respir. Physiol. Neurobiol. **184**, 214-222.
- 512 **Nilsson, G. E. and Östlund-Nilsson, S.** (2008). Does size matter for hypoxia tolerance in fish?  
513 Biol. Rev. **83**, 173-189.
- 514 **Odell, J. P., Chappell, M. A. and Dickson, K. A.** (2003). Morphological and enzymatic  
515 correlates of aerobic and burst performance on different populations of Trinidadian guppies  
516 *Poecilia reticulata*. J. Exp. Biol. **206**, 3707-3718.
- 517 **Pang, X., Cao, Z. D., Peng, J. L. and Fu, S. J.** (2010) The effects of feeding on the swimming  
518 performance and metabolic response of juvenile southern catfish, *Silurus meridionalis*,  
519 acclimated at different temperatures. Comp. Biochem. Physiol. **155A**, 253-258.
- 520 **Pang, X., Cao, Z. D., Peng, J. L. and Fu, S. J.** (2011) The effects of temperature on metabolic  
521 interaction between digestion and locomotion in juveniles of three cyprinid fish (*Carassius*  
522 *auratus*, *Cyprinus carpio* and *Spinibarbus sinensis*). Comp. Biochem. Physiol. **159A**,  
523 253-260.
- 524 **Plaut, I.** (2001). Critical swimming speed: its ecological relevance. Comp. Biochem. Physiol.  
525 **131A**, 41-50.
- 526 **Pollock, M. S., Clarke, L. M. J. and Dubé, M. G.** (2007). The effects of hypoxia on fishes:  
527 from ecological relevance to physiological effects. Environ. Rev. **15**, 1-14.
- 528 **Rabalais, N. N., Díaz, R. J., Levin, L. A., Turner, R. E., Gilbert, D. and Zhang, J.** 2010.



- 529 Dynamics and distribution of natural and human-caused hypoxia. *Biogeosciences*. **7**,  
530 585–619.
- 531 **Reidy, S. P., Kerr, S. R. and Nelson, J. A.** (2000). Aerobic and anaerobic swimming  
532 performance of individual Atlantic cod. *J. Exp. Biol.* **203**, 347-357.
- 533 **Routley, M. H., Nilsson, G. E. and Renshaw, G. M. C.** (2002). Exposure to hypoxia primes the  
534 respiratory and metabolic responses of the epaulette shark to progressive hypoxia. *Comp.*  
535 *Biochem. Physiol.* **131A**, 313-321.
- 536 **Sänger, A. M.** (1993). Limits to the acclimation of fish muscle. *Rev. Fish Biol. Fish.* **3**, 1-15.
- 537 **Shingles, A., McKenzie, D. J., Claireaux, G. and Domenici, P.** (2005). Reflex  
538 cardioventilatory responses to hypoxia in the flathead gray mullet (*Mugil cephalus*) and  
539 their behavioral modulation by perceived threat of predation and water turbidity. *Physiol.*  
540 *Biochem. Zool.* **78**, 744-755.
- 541 **Shoubridge, E. A. and Hochachka, P. W.** (1980). Ethanol: novel end product of vertebrate  
542 anaerobic metabolism. *Science*, **209**, 308-309.
- 543 **Silkin, Y. A. and Silkina, E. N.** (2005). Effect of hypoxia on physiological-biochemical blood  
544 parameters in some marine fish. *J. Evol. Biochem. Physiol.* **41**, 527-532.
- 545 **Sloman, K. A., Mandic, M., Todgham, A. E., Fanguie, N. A., Subrt, P. and Richards, J. G.**  
546 (2008). The response of the tidepool sculpin, *Oligocottus maculosus*, to hypoxia in  
547 laboratory, mesocosm and field environments. *Comp. Biochem. Physiol.* **149A**, 284-292.
- 548 **Sloman, K. A., Wood, C. M., Scott, G. R., Wood, S., Kajimura, M., Johannsson, O. E.,**  
549 **Almeida-Val, V. M. and Val, A. L.** (2006). Tribute to R. G. Boutilier: the effect of size on  
550 the physiological and behavioural responses of oscar, *Astronotus ocellatus*, to hypoxia. *J.*  
551 *Exp. Biol.* **209**, 1197-1205.

- 552 **Sollid, J., De Angelis, P., Gundersen, K. and Nilsson, G.** (2003). Hypoxia induced adaptive  
553 and reversible gross morphological changes in crucian carp gills. *J. Exp. Biol.* **206**,  
554 3667-3673.
- 555 **Sollid, J., Weber, R. E. and Nilsson, G. E.** (2005). Temperature alters the respiratory surface  
556 area of crucian carp *Carassius carassius* and goldfish *Carassius auratus*. *J. Exp. Biol.* **208**,  
557 1109-1116.
- 558 **Speers-Roesch, B., Richards, J. G., Brauner, C. J., Farrell1, A. P., Hickey, A. J. R., Wang, Y.**  
559 **S. and Renshaw, G. M. C.** (2012). Hypoxia tolerance in elasmobranchs. I. Critical oxygen  
560 tension as a measure of blood oxygen transport during hypoxia exposure. *J. Exp. Biol.* **215**,  
561 93-102.
- 562 **Takasusuki, J., Fernandes, M. N. and Severi, W.** (1998). The occurrence of aerial respiration  
563 in *Rhinelepis strigosa* during progressive hypoxia. *J. Fish Biol.* **52**, 369-379.
- 564 **Ultsch G. R., Boschung H. and Ross M. J.** (1978). Metabolism, critical oxygen tension, and  
565 habitat selection in darters (*Etheostoma*). *Ecology.* **59**, 99-107.
- 566 **Wang, X.Z.** (2005). Molecular phylogeny of the East Asian cyprinids (Pisces: Cypriniformes).  
567 Institute of Hydrobiology, Chinese Academy of Sciences.
- 568 **Wells, R. M. G., Grigg, G. C., Beard, L. A. and Summers, G.** (1989). Hypoxic responses in a  
569 fish from a stable environment: blood oxygen transport in the antarctic fish *Pagothenia*  
570 *borchgrevinki*. *J. Exp. Biol.* **141**, 97-111.
- 571 **Yeager, D. P. and Ultsch, G. R.** (1989). Physiological regulation and conformation: a basic  
572 program for the determination of critical points. *Physiol. Zool.* **62**, 888-907.
- 573 **Zhang, W., Cao, Z. D., Peng, J. L., Chen, B. J. and Fu, S. J.** (2010). The effects of dissolved  
574 oxygen level on the metabolic interaction between digestion and locomotion in juvenile



**Table 1.** Biological information and body size of the 12 fish species used in this study.

| Common name                  | Latin name                         | Preferred habitat | Distribution * | Collected sites | Body mass (g) | Body length (cm) | Gill remodelling ability      |
|------------------------------|------------------------------------|-------------------|----------------|-----------------|---------------|------------------|-------------------------------|
| Mountain carp (SP)           | <i>Schizothorax prenanti</i>       | Rapid-flow        | M(1.5-4)       | M (2-4)         | 8.72±0.35     | 8.49±0.13        | NO (Present Study)            |
| Sharp-jaw barbell (OS)       | <i>Onychostoma sima</i>            | Rapid-flow        | R( 1.5-4)      | R (1.5-4)       | 3.92±0.23     | 6.34±0.16        | NO (Present Study)            |
| Qingbo (SS)                  | <i>Spinibarbus sinensis</i>        | Rapid-flow        | R(1.5-4)       | R (1.5-4)       | 6.61±0.24     | 7.10±0.08        | NO (Present Study)            |
| Chinese hook snout carp (ZP) | <i>Zacco platypus</i>              | Rapid-flow        | R, M(1.5-4)    | R (1.5-4)       | 6.79±0.10     | 4.69±0.20        | NO (Present Study)            |
| Silver carp (HM)             | <i>Hypophthalmichthys molitrix</i> | Intermediate      | L, R(0-2)      | L (0)           | 7.30±0.08     | 6.48±0.25        | YES<br>(Dhillon et al., 2013) |
| Chinese bream (PP)           | <i>Parabramis pekinensis</i>       | Intermediate      | L, R(0-2)      | L (0)           | 9.05±0.32     | 7.96±0.12        | NO<br>(Dhillon et al., 2013)  |
| Grass carp (CI)              | <i>Ctenopharyngodon idellus</i>    | Intermediate      | L, R(0-3)      | L (0)           | 9.22±0.23     | 9.24±0.12        | YES<br>(Dhillon et al., 2013) |
| Black carp (CP)              | <i>Ctenopharyngodon piceus</i>     | Intermediate      | L, R(0-2)      | L (0)           | 6.27±0.09     | 4.29±0.15        | NO<br>(Dhillon et al., 2013)  |
| Goldfish (AA)                | <i>Carassius auratus</i>           | Slow-flow         | /              | /               | 6.45±0.36     | 5.85±0.14        | YES<br>(Dhillon et al., 2013) |
| Crucian carp (CA)            | <i>Carassius carassius</i>         | Slow- flow        | P, L, R(0-1)   | L (0)           | 8.60±0.40     | 6.96±0.14        | YES<br>(Dhillon et al., 2013) |
| Common carp (CC)             | <i>Cyprinus carpio</i>             | Slow- flow        | P, L, R(0-3)   | L (0)           | 7.05±0.23     | 6.40±0.08        | YES<br>(Dhillon et al., 2013) |
| Bighead carp (AN)            | <i>Aristichthys nobilis</i>        | Slow- flow        | L(0)           | L (0)           | 11.27±0.44    | 8.73±0.14        | YES<br>(Dhillon et al., 2013) |

\* L: lake, P: pond, R: River, M: mountain steam. Distribution is based on our investigation, local fish catchment and information from local fishermen. The number in brackets is the water velocity ( $m s^{-1}$ ). Common carp and crucian carp are classified as slow-flow type because they live well in pond.

## Captions

**Fig. 1.** The phylogenetic relationship among the 12 experimental cyprinid species (the hierarchical topology tree was built based on the data of Wang 2005). See Table 1 for more information regarding each of the selected fish species.

**Fig. 2.** The oxygen threshold for aquatic surface respiration ( $ASR_{50}$ ,  $\text{mgO}_2 \text{ L}^{-1}$ ) (Fig. 2A) and loss of equilibrium ( $LOE_{50}$ ,  $\text{mgO}_2 \text{ L}^{-1}$ ) (Fig. 2B) of 12 different cyprinid fish species and the relationship between  $ASR_{50}$  and  $LOE_{50}$  among 12 fish species from three different habitats (rapid-flow, blank circle; intermediate, grey circle; slow-flow, dark circle) (Fig. 2C). Shared letters A, B, C indicated no difference in the trait measured (ANCOVA with habitat as a factor ( $n = 3$ ) and Duncan post-hoc tests) among groups of fish species from different habitat types (rapid-flow, blank column; intermediate, grained column; slow-flow, filled column). The results of nested ANCOVA according to different preferred habitats and species (nested within habitat) and PDANOVA were listed above the figure. \$, the  $LOE_{50}$  of AA and CA were zero.

**Fig. 3.** The critical oxygen tension for routine metabolic rate ( $P_{\text{crit}}$ ,  $\text{mgO}_2 \text{ L}^{-1}$ ) (Fig. 3A) and routine metabolic rate ( $\dot{M}_{\text{O}_2 \text{ rest}}$ ,  $\text{mgO}_2 \text{ kg}^{-1} \text{ h}^{-1}$ ) (Fig. 3B) of 12 different cyprinid fish species and the relationship between  $P_{\text{crit}}$  and  $\dot{M}_{\text{O}_2 \text{ rest}}$  among 12 fish species from three different habitats (rapid-flow, blank circle; intermediate, grey circle; slow-flow, dark circle) (Fig. 3C). Shared letters A, B, C indicated no difference in the trait measured (ANCOVA with habitat as a factor ( $n = 3$ ) and Duncan post-hoc tests) among groups of fish species from different habitat types (rapid-flow, blank column; intermediate, grained column; slow-flow, filled column). The results

of nested ANCOVA according to different preferred habitats and species (nested within habitat) and PDANOVA were listed above the figure.

**Fig. 4.** The  $U_{crit}$  (BL s<sup>-1</sup>) of the control (blank column) and 48 h hypoxia-acclimated (filled column) cyprinid fish species measured under normoxic (Fig. 4A) and hypoxic (Fig. 4B) conditions. Shared letters A, B, C indicated no difference in the trait measured (ANCOVA with habitat as a factor (n = 3) and Duncan post-hoc tests) among groups of fish species from different habitat types. \* indicated significant difference in  $U_{crit}$  between the hypoxia-acclimated and non-acclimated fish (t-test). The results of nested ANCOVA according to different preferred habitats and species (nested within habitat) and PDANOVA (we only compared control fish measured under normoxic condition) were listed above the figure.

**Fig. 5.** The  $\dot{M}_{O_2 \max}$  (mgO<sub>2</sub> kg<sup>-1</sup> h<sup>-1</sup>) of of the control (blank column) and 48 h hypoxia-acclimated (filled column) cyprinid fish species measured under normoxic (Fig. 5A) and hypoxic (Fig. 5B) conditions. \* indicated significant difference in  $\dot{M}_{O_2 \max}$  between the hypoxia-acclimated and non-acclimated fish (t-test). The results of nested ANCOVA according to different preferred habitats and species (nested within habitat) and PDANOVA (we only compared control fish measured under normoxic condition) were listed above the figure.

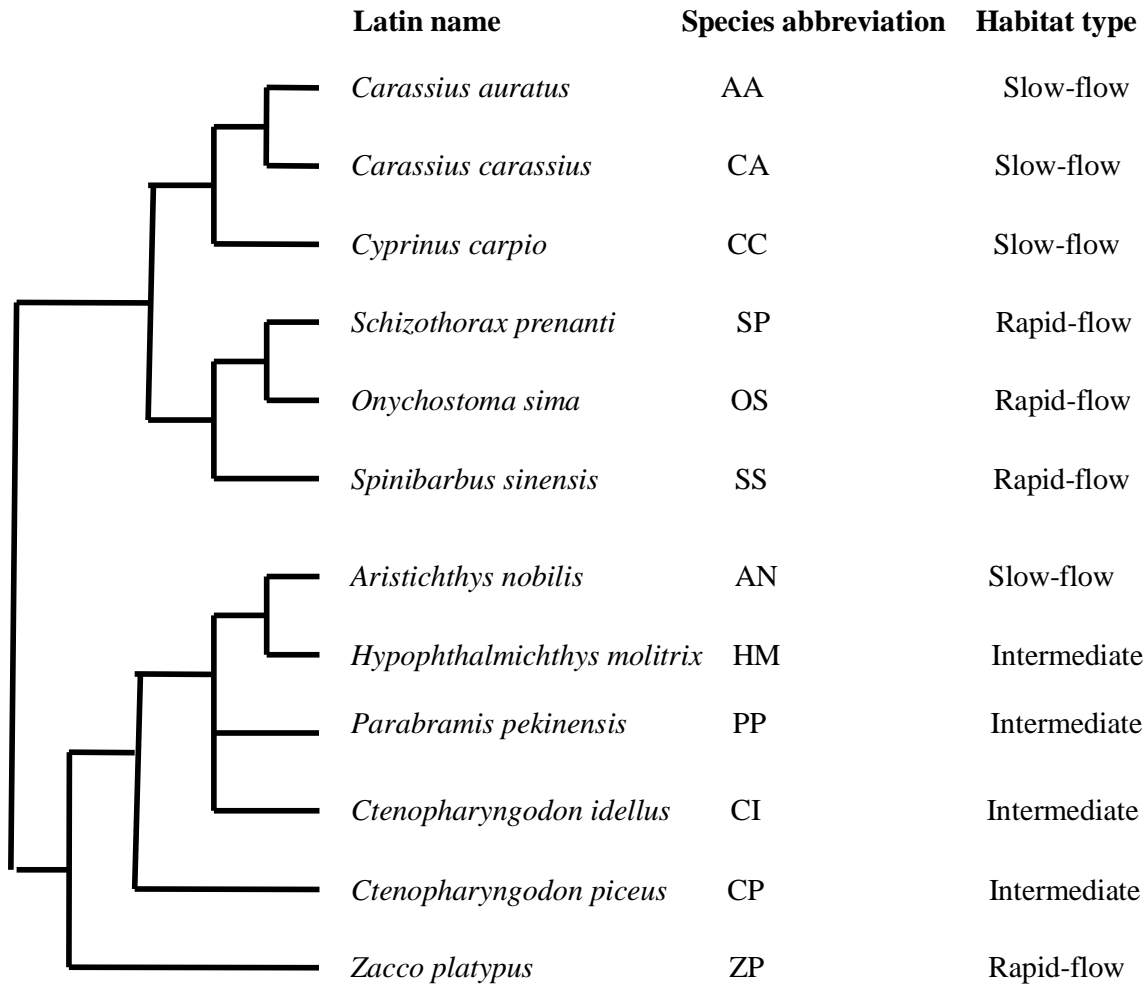

Fig. 1

A) ASR<sub>50</sub>

Nested ANCOVA: Habitat effect  $F_{2,9} = 4.08, P = 0.055$   
Species effect  $F_{3,3} = 8.47, P < 0.001$   
Body length effect  $F_1 = 0.671, P = 0.421$   
PDANOVA (Habitat effect):  $CV = 32.15, P = 0.429$

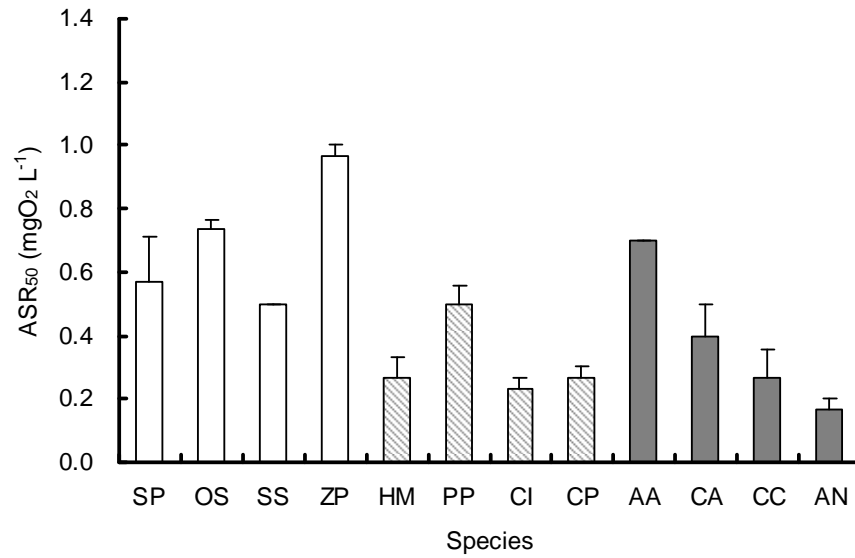

Fig. 2A



## B) LOE<sub>50</sub>

Nested ANCOVA: Habitat effect  $F_{2,9} = 12.02, P = 0.003$   
Species effect  $F_{3,3} = 80.00, P < 0.001$   
Body length effect  $F_1 = 2.822, P = 0.106$

PDANOVA (Habitat effect):  $CV = 21.49, P = 0.004$

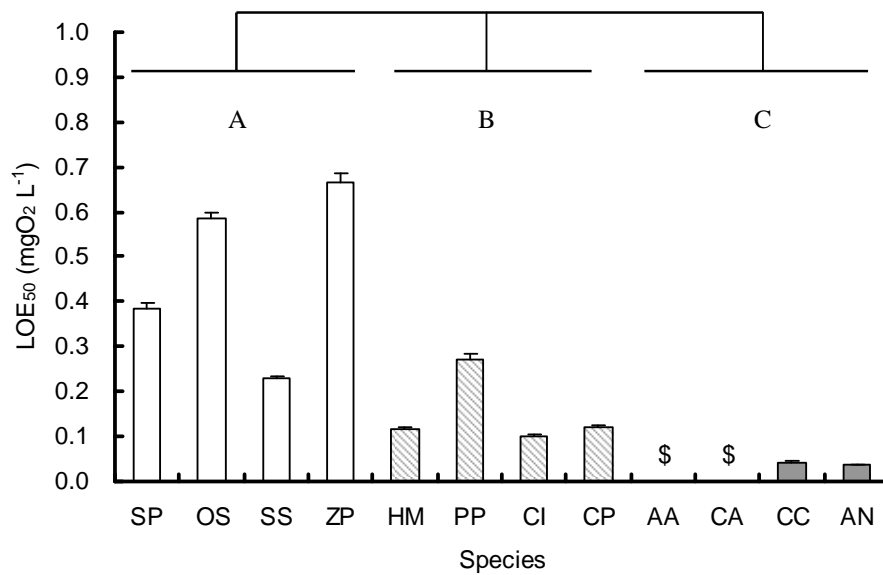

Fig. 2B

C) Correlation between  $ASR_{50}$  and  $LOE_{50}$

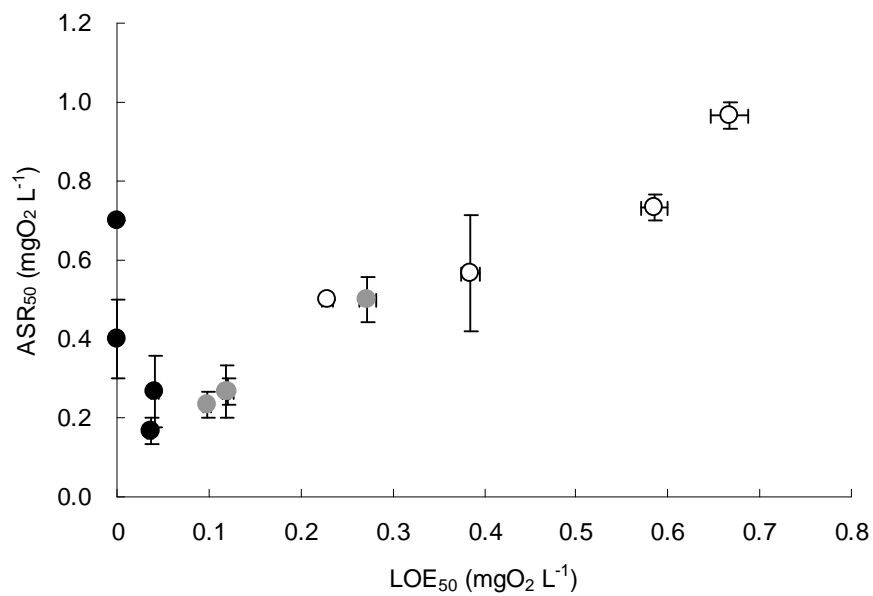

Fig. 2C

A)  $P_{crit}$

Nested ANCOVA: Habitat effect  $F_{2,9} = 2.069, P = 0.182$   
Species effect  $F_{3,3} = 10.00, P < 0.001$   
Body mass effect  $F_1 = 1.245, P = 0.266$   
PDANOVA (Habitat effect):  $CV = 16.19, P = 0.049$

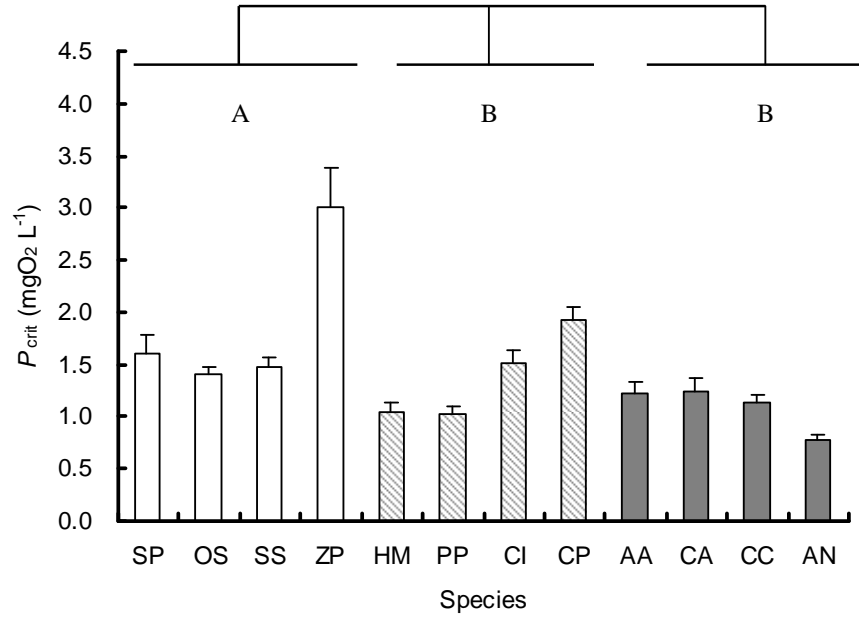

Fig. 3A

B)  $\dot{M}_{O_2 \text{ rest}}$

Nested ANCOVA: Habitat effect  $F_{2,9} = 1.006, P = 0.403$   
Species effect  $F_{3,3} = 9.44, P < 0.001$   
Body mass effect  $F_1 = 2.92, P = 0.089$   
PDANOVA (Habitat effect):  $CV = 11.09, P = 0.143$

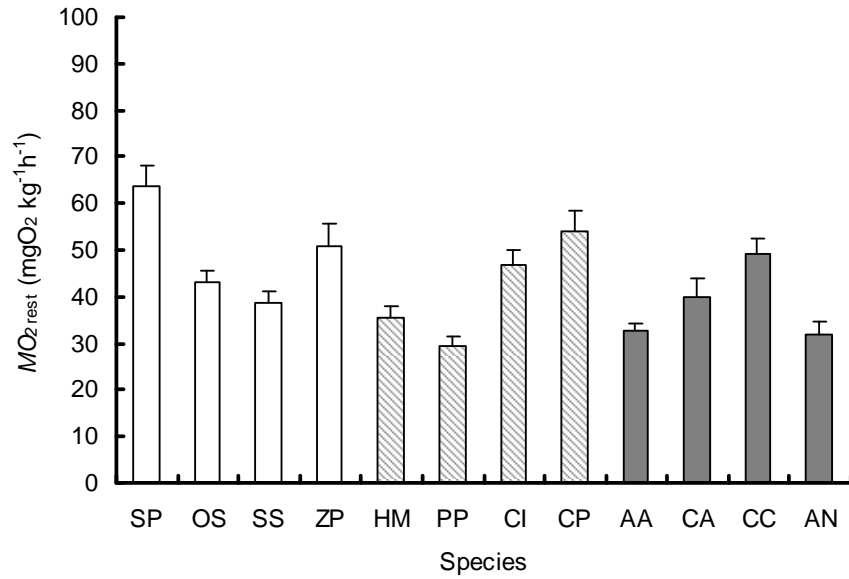

Fig. 3B

C) Correlation between  $P_{\text{crit}}$  and  $\dot{M}_{\text{O}_2 \text{rest}}$

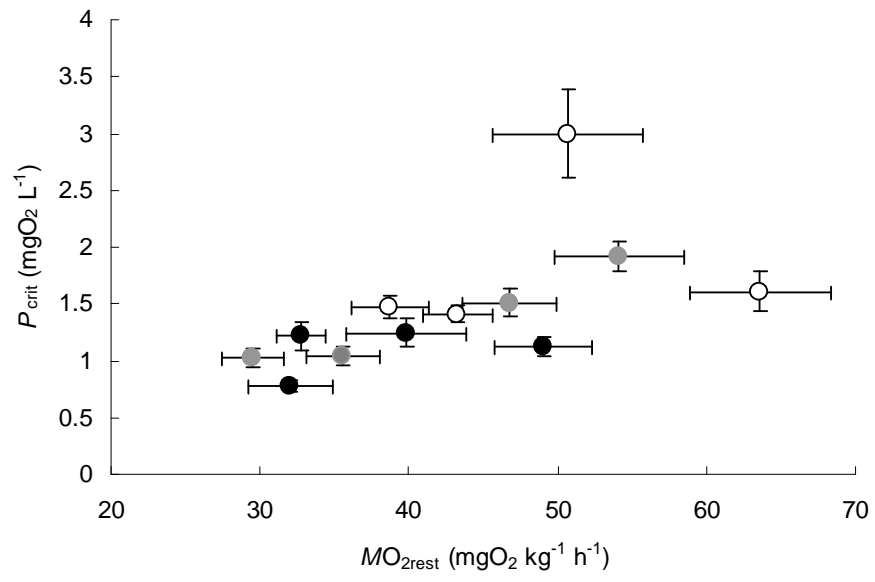

Fig. 3C

A) Normoxic condition

Nested ANCOVA: Habitat effect  $F_{2,9} = 4.21, P = 0.051$   
 Species effect  $F_{3,3} = 15.42, P < 0.001$   
 Body length effect  $F_1 = 31.99, P < 0.001$   
 PDANOVA (Habitat effect):  $CV = 19.60, P = 0.046$

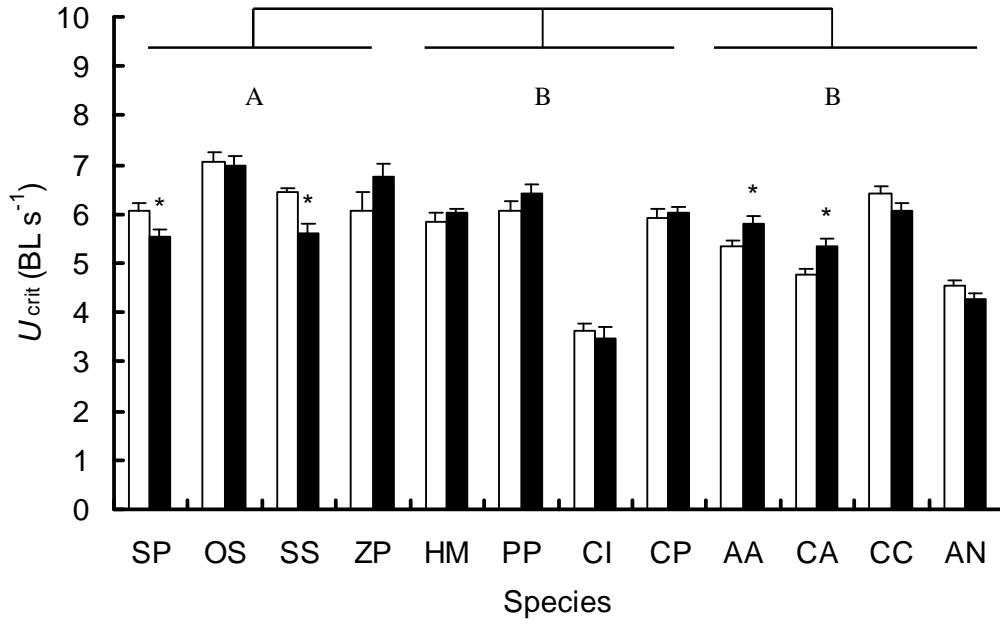

B) Hypoxic condition

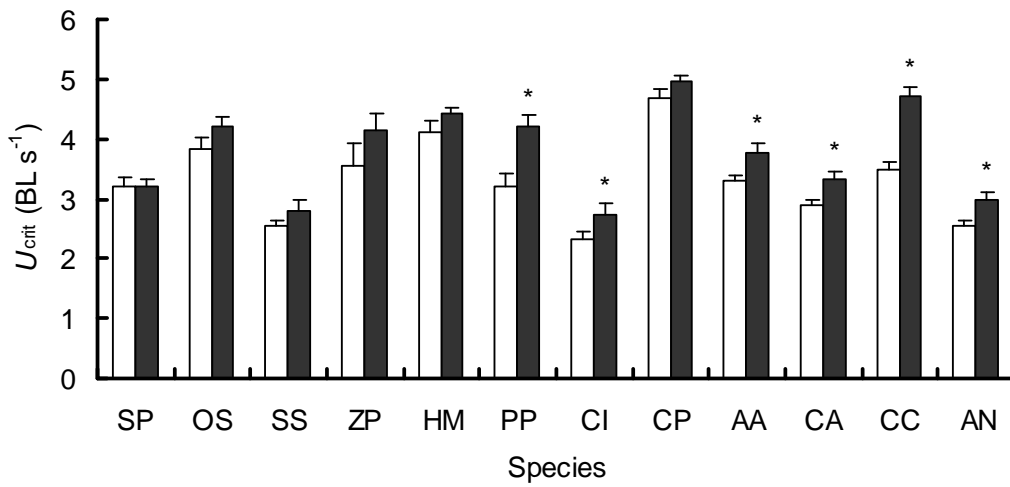

Fig. 4

A) Normoxic condition

Nested ANCOVA: Habitat effect  $F_{2,9} = 0.685$ ,  $P = 0.529$   
 Species effect  $F_{3,3} = 9.46$ ,  $P < 0.001$   
 Body mass effect  $F_1 = 0.004$ ,  $P = 0.949$

PDANOVA (Habitat effect):  $CV = 10.19$ ,  $P = 0.095$

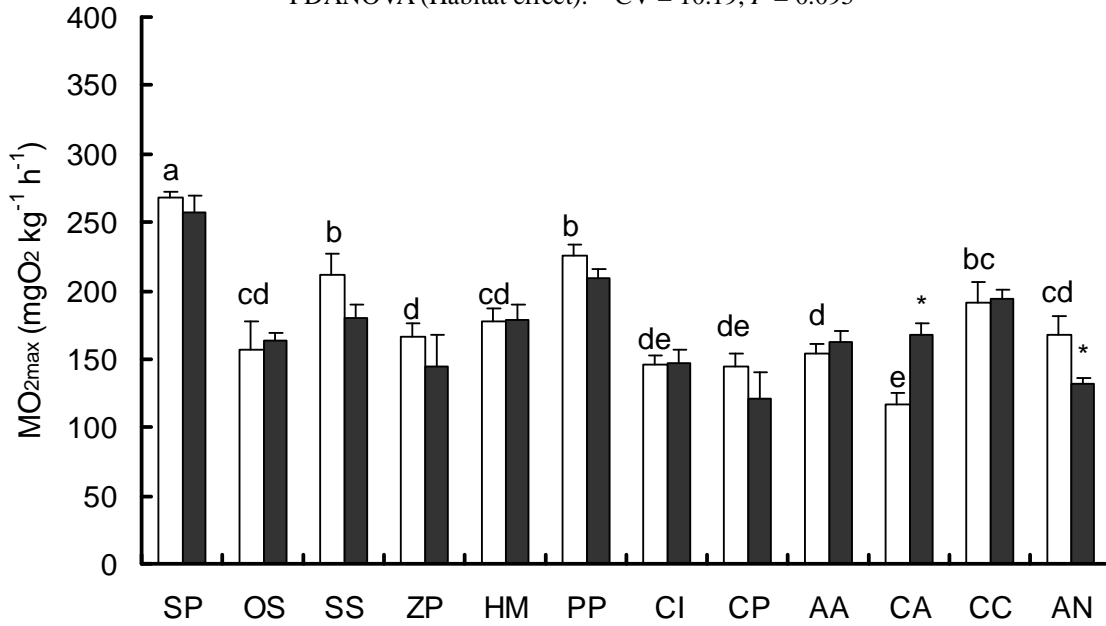

B) Hypoxic condition

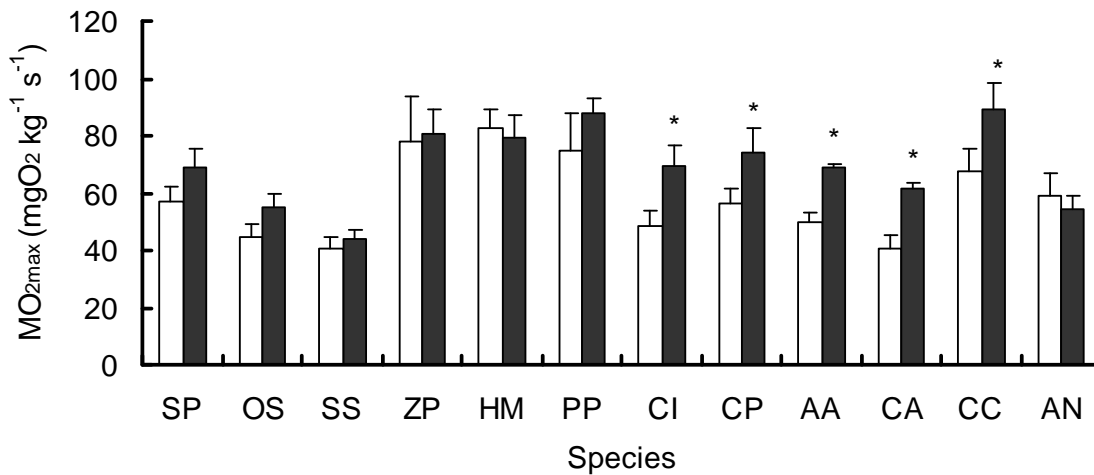

Fig. 5
